# Supplementary material for: Effect of Pre-Oxidation on a Ti PVD Coated Ferritic Steel Substrate during High-Temperature Aging
Source: MDPI journal article supplement (doi:10.3390/cryst12121732), 2022-12-01
Supplement: s1 [file s1]

**Effect of pre-oxidation on a Ti PVD coated ferritic steel substrate during high-temperature aging.**

**Supplementary material**

M. R. Ardigo-Besnard<sup>a</sup>, A. Besnard<sup>b</sup>, G. Nkou Bouala<sup>b</sup>, P. Boulet<sup>c</sup>, Y. Pinot<sup>b</sup> Q. Ostorero<sup>a</sup>

<sup>a</sup>*Laboratoire Interdisciplinaire Carnot de Bourgogne (ICB), UMR 6303 CNRS, Université Bourgogne Franche-Comté, BP 47870, 21078 DIJON Cedex, France*

<sup>b</sup>*Arts et Metiers Institute of Technology, LaBoMaP, Université Bourgogne Franche-Comté, HESAM Université, 71250 Cluny, France*

<sup>c</sup>*Institut Jean Lamour, UMR CNRS 7198, Université de Lorraine, 54000, Nancy, France*

S1: XRD patterns (Bragg-Brentano conditions) of the ferritic steel oxidized for 100 hours at 800 °C in ambient air.

S2: XRD patterns (Bragg-Brentano conditions) of the Ti coating on Si substrate.

S3: XRD patterns (incidence angle of 2°) of the ferritic steel oxidized for 1 hour at 800 °C in ambient air.

S4: XRD patterns (incidence angle of 2°) of the ferritic steel pre-oxidized for 1 hour at 800 °C in ambient air, coated with Ti and then oxidized for 100 hours at 800 °C in ambient air.

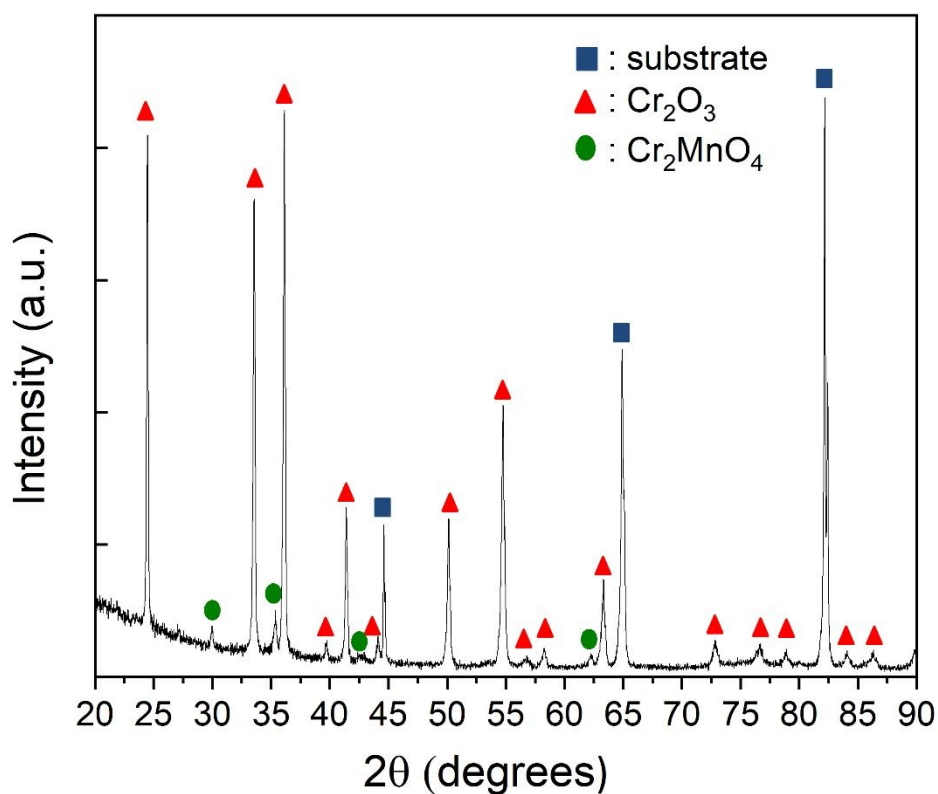

Figure S1: XRD patterns (Bragg-Brentano conditions) of the ferritic steel oxidized for 100 hours at 800 °C in ambient air.

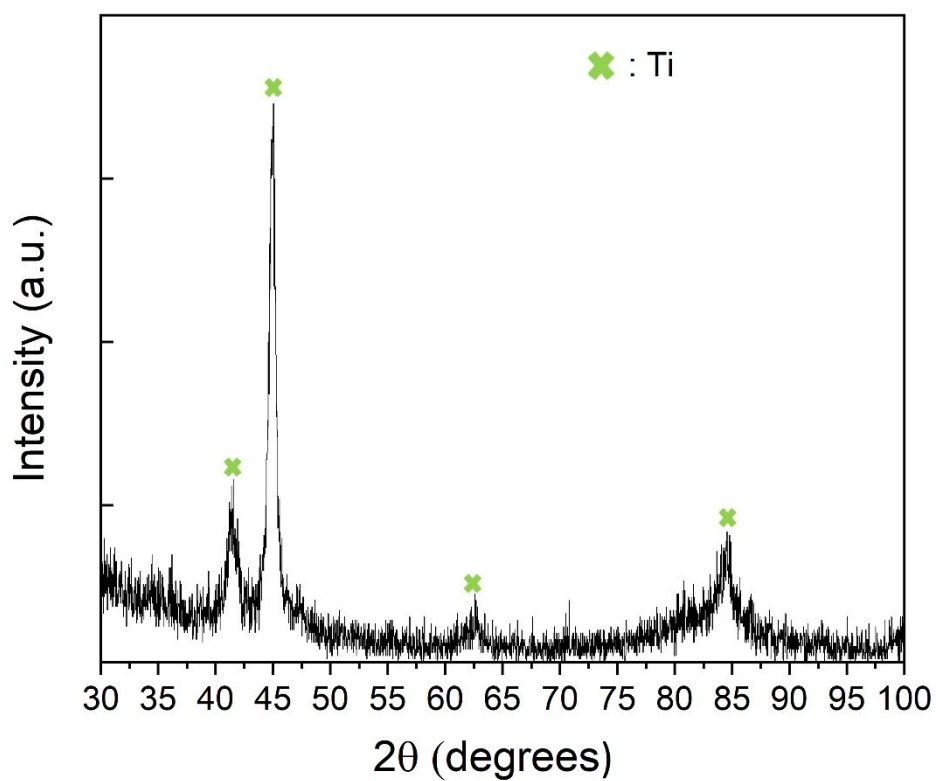

Figure S2: XRD patterns (Bragg-Brentano conditions) of the Ti coating on Si substrate.

Effect of pre-oxidation on a Ti PVD coated ferritic steel substrate during high-temperature aging.

M. R. Ardigo-Besnard, A. Besnard, G. Nkou Bouala, P. Boulet, Y. Pinot, Q. Ostorero

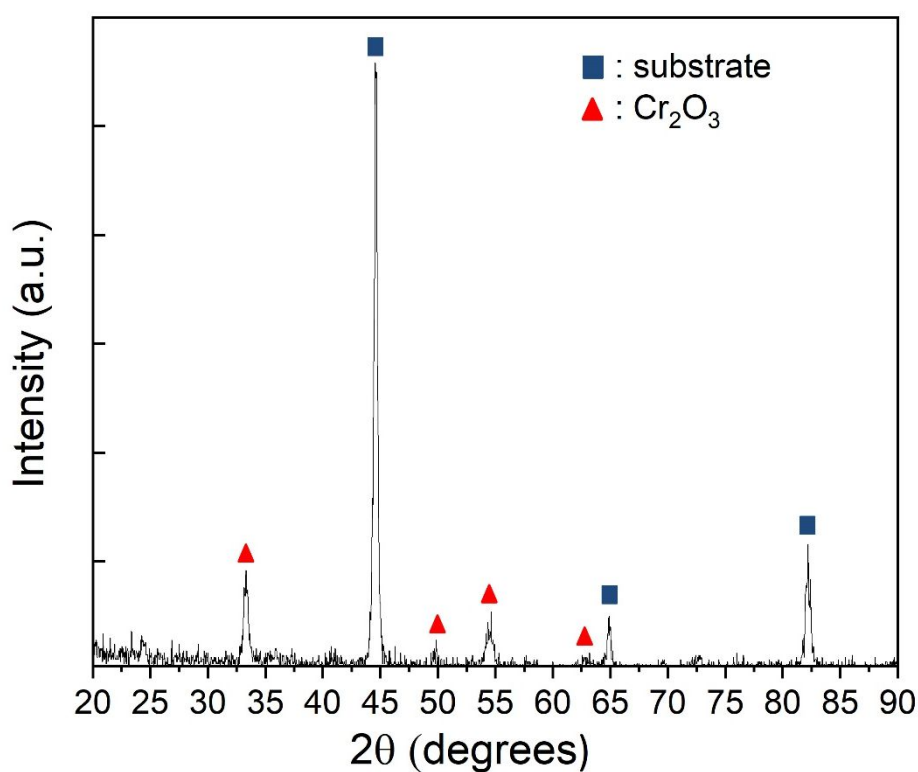

Figure S3: XRD patterns (incidence angle of  $2^\circ$ ) of the ferritic steel oxidized for 1 hour at 800 °C in ambient air.

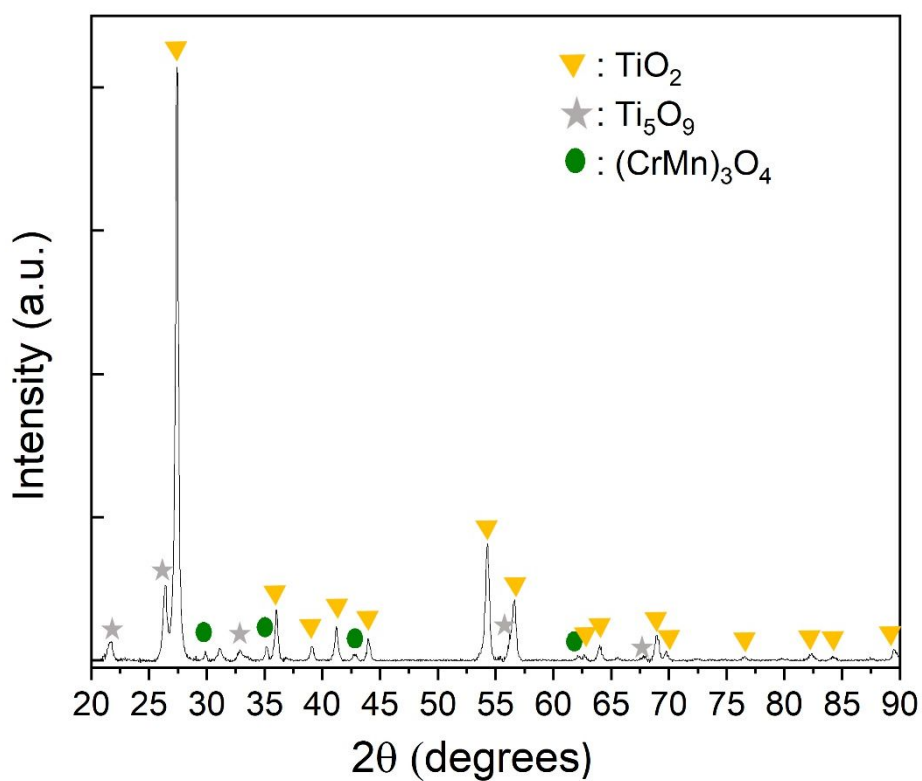

Figure S4: XRD patterns (incidence angle of  $2^\circ$ ) of the ferritic steel pre-oxidized for 1 hour at 800 °C in ambient air, coated with Ti and then oxidized for 100 hours at 800 °C in ambient air.

Effect of pre-oxidation on a Ti PVD coated ferritic steel substrate during high-temperature aging.

M. R. Ardigo-Besnard, A. Besnard, G. Nkou Bouala, P. Boulet, Y. Pinot, Q. Ostorero
