# Supplementary material for: Effect of Pre-Oxidation on a Ti PVD Coated Ferritic Steel Substrate during High-Temperature Aging
Source: MDPI journal article supplement (doi:10.3390/cryst12121732), 2022-12-01
Supplement: s1 [file s1]

Archive with 1 entries (1 files):
- crystals-2058900-supplementary.pdf
